# Supplementary material for: Heterodimeric protein complex identification by naïve Bayes classifiers
Source: Springer Nature journal article supplement (doi:10.1186/1471-2105-14-347), 2013-12-01
Supplement: 12859_2013_6220_MOESM4_ESM.pdf [file 12859_2013_6220_MOESM4_ESM.pdf]

WI-PHI

PPI

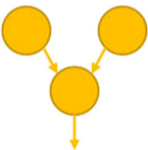

prediction

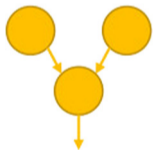

prediction

Evaluation by CYC2008
